# Supplementary material
Source: PubMed Central journal article supplement (PMC6561381)

## Supplemental Materials

**Supplemental Table S1.** SIVkrc infection prevalence from HIV-2 Western blot and RT-qPCR.

|         | <b>N</b> | <b>Prevalence (95% CI)</b> |
|---------|----------|----------------------------|
| Males   | 21       | 52.6% (31.7%-72.7%)        |
| Females | 8        | 25% (7.1%-59.1%)           |
| Total   | 29       | 41.4% (25.5%-59.3%)        |

**Supplemental Table S2.** Enriched GO Pathways for PC loadings of first four PCs.  
FDR: False Discovery Rate.

| <b>PC</b> | <b>FDR</b> | <b>GO Pathway</b>                                  |
|-----------|------------|----------------------------------------------------|
| PC1       | 1E-292     | RNA Processing                                     |
|           | 1E-284     | Cellular protein localization                      |
|           | 4E-287     | Cellular macromolecule localization                |
|           | 1E-293     | Single-organism organelle organization             |
| PC2       | 1E-56      | Ribonucleoprotein complex biogenesis               |
|           | 1E-64      | NcRNA processing                                   |
|           | 5E-61      | NcRNA metabolic process                            |
|           | 7E-49      | Ribosome biogenesis                                |
| PC3       | 9E-19      | Cotranslational protein targeting to membrane      |
|           | 2E-21      | SRP-dependent co-translational protein targeting   |
|           | 2E-21      | Protein targeting to ER                            |
|           | 5E-17      | Protein localization to endoplasmic reticulum      |
|           | 8E-20      | Establishment of protein localization to endoplasm |
| PC4       | 9E-15      | Viral Process                                      |
|           | 4E-14      | Multi-organism metabolic process                   |
|           | 2E-14      | Symbiosis, encompassing mutualism                  |
|           | 2E-14      | Interspecies interaction between organisms         |
|           | 2E-14      | Multi-organism cellular process                    |

**Supplemental Table S3A.** Enriched GO pathways for clusters of genes identified by k-means clustering in uninfected individuals.

| <b>Uninfected</b> |            |                         |                                                  |
|-------------------|------------|-------------------------|--------------------------------------------------|
| <b>Cluster</b>    | <b>FDR</b> | <b>Genes</b>            | <b>Pathways</b>                                  |
| A                 | 1.30E-06   | 68                      | Immune response                                  |
|                   | 2.30E-06   | 56                      | Defense response                                 |
|                   | 7.30E-06   | 80                      | Immune system process                            |
|                   | 7.30E-06   | 75                      | Cell surface receptor signaling pathway          |
|                   | 1.50E-05   | 35                      | Response to biotic stimulus                      |
|                   | 1.80E-05   | 59                      | Response to external stimulus                    |
|                   | 1.80E-05   | 19                      | Response to virus                                |
|                   | 1.80E-05   | 33                      | Response to external biotic stimulus             |
|                   | 1.80E-05   | 71                      | Regulation of multicellular organismal process   |
|                   | 1.80E-05   | 16                      | Defense response to virus                        |
|                   | B          | 5.10E-10                | 40                                               |
| 5.40E-10          |            | 36                      | Angiogenesis                                     |
| 7.10E-10          |            | 42                      | Blood vessel development                         |
| 7.10E-10          |            | 43                      | Vasculature development                          |
| 7.10E-10          |            | 86                      | Movement of cell or subcellular component        |
| 9.80E-10          |            | 43                      | Cardiovascular system development                |
| 9.90E-10          |            | 157                     | System development                               |
| 1.80E-09          |            | 26                      | Regulation of vasculature development            |
| 3.30E-09          |            | 53                      | Circulatory system development                   |
| 6.30E-09          |            | 24                      | Regulation of angiogenesis                       |
| C                 | 3.20E-42   | 187                     | Immune response                                  |
|                   | 1.20E-41   | 221                     | Immune system process                            |
|                   | 2.70E-35   | 123                     | Immune effector process                          |
|                   | 7.70E-35   | 91                      | Myeloid leukocyte activation                     |
|                   | 7.70E-35   | 142                     | Secretion                                        |
|                   | 1.90E-33   | 93                      | Cell activation involved in immune response      |
|                   | 2.50E-33   | 133                     | Secretion by cell                                |
|                   | 5.60E-33   | 92                      | Leukocyte activation involved in immune response |
|                   | 6.20E-33   | 83                      | Myeloid leukocyte mediated immunity              |
| 1.00E-32          | 82         | Leukocyte degranulation |                                                  |
| D                 | 2.50E-06   | 33                      | Inflammatory response                            |
|                   | 3.60E-05   | 78                      | Immune system process                            |
|                   | 4.90E-05   | 72                      | Cell surface receptor signaling pathway          |
|                   | 6.50E-05   | 49                      | Locomotion                                       |
|                   | 8.10E-05   | 45                      | Cell activation                                  |
|                   | 1.50E-04   | 87                      | Regulation of response to stimulus               |

|   |          |    |                                                     |
|---|----------|----|-----------------------------------------------------|
|   | 1.50E-04 | 21 | Leukocyte migration                                 |
|   | 1.70E-04 | 54 | Cell proliferation                                  |
|   | 1.70E-04 | 51 | Movement of cell or subcellular component           |
|   | 1.70E-04 | 42 | Cell motility                                       |
| E | 1.60E-10 | 38 | Neutrophil activation involved in immune response   |
|   | 1.60E-10 | 50 | Exocytosis                                          |
|   | 1.60E-10 | 38 | Neutrophil activation                               |
|   | 1.60E-10 | 38 | Neutrophil degranulation                            |
|   | 1.60E-10 | 47 | Regulated exocytosis                                |
|   | 1.60E-10 | 38 | Neutrophil mediated immunity                        |
|   | 1.60E-10 | 38 | Granulocyte activation                              |
|   | 1.90E-10 | 39 | Leukocyte degranulation                             |
|   | 2.40E-10 | 39 | Myeloid cell activation involved in immune response |
|   | 2.60E-10 | 39 | Myeloid leukocyte mediated immunity                 |

---

**Supplemental Table S3B.** Enriched GO pathways for clusters of genes identified by k-means clustering in infected individuals.

| Infected |          |            |                                                     |
|----------|----------|------------|-----------------------------------------------------|
| Cluster  | FDR      | # of Genes | Pathways                                            |
| A        | 1.00E-22 | 65         | Cell division                                       |
|          | 3.30E-17 | 44         | Chromosome segregation                              |
|          | 3.10E-16 | 74         | Mitotic cell cycle                                  |
|          | 5.50E-15 | 84         | Cell cycle process                                  |
|          | 6.10E-15 | 102        | Cell cycle                                          |
|          | 1.20E-14 | 64         | Mitotic cell cycle process                          |
|          | 6.80E-14 | 32         | Sister chromatid segregation                        |
|          | 1.70E-13 | 33         | Mitotic nuclear division                            |
|          | 2.20E-13 | 36         | Nuclear chromosome segregation                      |
|          | 2.90E-13 | 41         | Nuclear division                                    |
| B        | 2.10E-10 | 65         | Homeostatic process                                 |
|          | 2.10E-10 | 16         | Iron ion homeostasis                                |
|          | 4.40E-09 | 11         | Porphyrin-containing compound metabolic process     |
|          | 2.00E-08 | 46         | Chemical homeostasis                                |
|          | 2.00E-08 | 100        | Regulation of biological quality                    |
|          | 2.60E-08 | 12         | Tetrapyrrole metabolic process                      |
|          | 3.00E-08 | 16         | Transition metal ion homeostasis                    |
|          | 3.70E-08 | 35         | Inorganic ion homeostasis                           |
|          | 6.30E-08 | 40         | Cellular homeostasis                                |
|          | 6.30E-08 | 36         | Ion homeostasis                                     |
| C        | 1.20E-40 | 120        | Regulated exocytosis                                |
|          | 3.50E-40 | 174        | Secretion                                           |
|          | 9.00E-40 | 165        | Secretion by cell                                   |
|          | 4.20E-38 | 124        | Exocytosis                                          |
|          | 2.80E-37 | 106        | Myeloid leukocyte activation                        |
|          | 1.70E-35 | 157        | Cell activation                                     |
|          | 1.20E-34 | 245        | Immune system process                               |
|          | 1.30E-34 | 95         | Leukocyte degranulation                             |
|          | 3.10E-34 | 95         | Myeloid cell activation involved in immune response |
|          | 4.80E-34 | 95         | Myeloid leukocyte mediated immunity                 |
| D        | 1.60E-16 | 134        | Immune system process                               |
|          | 3.70E-14 | 118        | Regulation of multicellular organismal process      |
|          | 6.70E-12 | 50         | Inflammatory response                               |

|          |     |                                              |
|----------|-----|----------------------------------------------|
| 6.70E-12 | 94  | Response to external stimulus                |
| 6.90E-12 | 99  | Immune response                              |
| 2.30E-11 | 104 | Regulation of localization                   |
| 2.80E-11 | 112 | Cell surface receptor signaling pathway      |
| 6.80E-11 | 26  | B cell activation                            |
| 7.10E-11 | 72  | Cell activation                              |
| 1.20E-10 | 59  | Positive regulation of immune system process |

**Supplemental Table S4A.** Enriched transcription factor binding motifs (and associated transcription factors and transcription factors families) in promoters of genes in gene clusters identified by k-means clustering in uninfected individuals.

| Uninfected |                   |        |           |          |
|------------|-------------------|--------|-----------|----------|
| Cluster    | TF Binding Motif  | TF     | TF family | FDR      |
| B          | TGTCAGGGGGC       | INSM1  | C2H2 ZF   | 3.30E-03 |
|            | GGGGCCCAAGGGGG    | PLAG1  | C2H2 ZF   | 3.30E-03 |
|            | CAGCTG            | ASCL2  | bHLH      | 7.00E-02 |
|            | GGGGGGGGGGCC      | PATZ1  | C2H2 ZF   | 7.00E-02 |
|            | GGGGATTCCCC       | NFKB2  | Rel       | 7.00E-02 |
|            | GGGGGGT           | ZIC5   | C2H2 ZF   | 7.00E-02 |
|            | CACAGCGGGGGGTC    | ZIC4   | C2H2 ZF   | 7.00E-02 |
|            | GTGGGCGTGG        | SP8    | C2H2 ZF   | 1.80E-01 |
|            | TTGGCACCGTGCCA    | NFIX   | SMAD      | 1.80E-01 |
|            | GCAGCTG           | NHLH2  | bHLH      | 1.80E-01 |
| C          | GGGGGGGGGGCC      | PATZ1  | C2H2 ZF   | 1.10E-02 |
|            | TTTCGCCTGGCACGTCA | ZBTB49 | C2H2 ZF   | 1.10E-02 |
|            | TGTCAGGGGGC       | INSM1  | C2H2 ZF   | 1.20E-01 |
|            | TGCAGTG           | ZBTB3  | C2H2 ZF   | 1.80E-01 |
|            | GGGGATTCCCC       | NFKB2  | Rel       | 1.80E-01 |
| D          | GGGGATTCCCC       | NFKB2  | Rel       | 1.40E-01 |
|            | GGGGGGGGGGCC      | PATZ1  | C2H2 ZF   | 1.50E-01 |

**Supplemental Table S4B.** Enriched transcription factor binding motifs (and associated transcription factors and transcription factors families) in promoters of genes in gene clusters identified by k-means clustering in uninfected individuals.

| Infected |                   |        |             |          |
|----------|-------------------|--------|-------------|----------|
| Cluster  | TF Binding Motif  | TF     | TF family   | FDR      |
| A        | GGGCGTG           | KLF7   | C2H2 ZF     | 1.30E-02 |
|          | GTGGGCGTGG        | SP8    | C2H2 ZF     | 1.30E-02 |
|          | TGCGGG            | ZBTB1  | C2H2 ZF     | 1.30E-02 |
|          | GGGGGGGGGCC       | PATZ1  | C2H2 ZF     | 1.70E-02 |
|          | GTGGGCGTGCC       | SP6    | C2H2 ZF     | 1.70E-02 |
|          | GGGGGCGGGGC       | SP2    | C2H2 ZF     | 2.50E-02 |
|          | GGCGGGAA          | E2F4   | E2F         | 4.10E-02 |
|          | GGGCGGGAA         | E2F6   | E2F         | 4.10E-02 |
|          | GCCAATCA          | PBX3   | Homeodomain | 5.80E-02 |
|          | TAACGG            | KLF9   | C2H2 ZF     | 6.10E-02 |
|          | CACAGCGGGGGGTC    | ZIC4   | C2H2 ZF     | 6.50E-02 |
|          | GGCCGGAG          | MBD2   | MBD         | 9.80E-02 |
|          | TTTGCGCC          | MYPOP  | Myb/SANT    | 1.20E-01 |
|          | GGGGGGT           | ZIC5   | C2H2 ZF     | 1.50E-01 |
|          | CAATAGCGGTGGTG    | ZBTB4  | C2H2 ZF     | 1.80E-01 |
|          | TGTCAGGGGGC       | INSM1  | C2H2 ZF     | 1.80E-01 |
| B        | GGGGGGGGGCC       | PATZ1  | C2H2 ZF     | 2.50E-02 |
|          | TTTCGCCTGGCACGTCA | ZBTB49 | C2H2 ZF     | 2.50E-02 |
|          | TGTCAGGGGGC       | INSM1  | C2H2 ZF     | 3.50E-02 |
|          | GGGCGTG           | KLF7   | C2H2 ZF     | 6.20E-02 |
|          | GGGGGCGGGGC       | SP2    | C2H2 ZF     | 1.40E-01 |
|          | GGCCGGAG          | MBD2   | MBD         | 1.80E-01 |
|          | GGGGCCCAAGGGGG    | PLAG1  | C2H2 ZF     | 2.40E-01 |
|          | TGCAGTG           | ZBTB3  | C2H2 ZF     | 2.40E-01 |
|          | TTTGCGCC          | MYPOP  | Myb/SANT    | 2.40E-01 |
| C        | GGGGGGGGGCC       | PATZ1  | C2H2 ZF     | 5.80E-03 |
|          | TGTCAGGGGGC       | INSM1  | C2H2 ZF     | 2.30E-02 |
|          | GGGGCCCAAGGGGG    | PLAG1  | C2H2 ZF     | 2.30E-02 |
|          | GCAGCTG           | NHLH2  | bHLH        | 1.00E-01 |
|          | GGGGGCGGGGC       | SP2    | C2H2 ZF     | 1.10E-01 |

|                |        |         |          |
|----------------|--------|---------|----------|
| CAGCTG         | ASCL2  | bHLH    | 1.10E-01 |
| CGCAGCTGCG     | NHLH1  | bHLH    | 1.10E-01 |
| CACAGCGGGGGGTC | ZIC4   | C2H2 ZF | 1.10E-01 |
| GGGCGTG        | KLF7   | C2H2 ZF | 1.30E-01 |
| GTGGGCGTGG     | SP8    | C2H2 ZF | 1.30E-01 |
| GGGGATTCCCC    | NFKB2  | Rel     | 1.30E-01 |
| GGGGGGT        | ZIC5   | C2H2 ZF | 1.30E-01 |
| GTAACAGCTG     | FERD3L | bHLH    | 1.30E-01 |

---

**Supplemental Table S5.** Enriched GO pathways for weighted gene co-expression networks in uninfected and infected individuals.

| <b>Uninfected</b>                                |              |            |
|--------------------------------------------------|--------------|------------|
| <b>GO Pathway</b>                                | <b>Genes</b> | <b>FDR</b> |
| Immune system process                            | 810          | 3.50E-77   |
| Cell activation                                  | 460          | 1.50E-66   |
| Response to external stimulus                    | 577          | 4.80E-61   |
| Leukocyte activation                             | 403          | 3.00E-56   |
| Immune response                                  | 592          | 3.10E-53   |
| Immune effector process                          | 374          | 1.50E-51   |
| Secretion                                        | 453          | 7.00E-51   |
| Secretion by cell                                | 424          | 9.70E-50   |
| Inflammatory response                            | 255          | 5.30E-45   |
| Regulated exocytosis                             | 265          | 4.00E-43   |
| Exocytosis                                       | 289          | 5.80E-43   |
| Regulation of multicellular organismal process   | 646          | 5.80E-43   |
| Cellular response to chemical stimulus           | 690          | 5.80E-43   |
| Cell surface receptor signaling pathway          | 658          | 2.60E-42   |
| Regulation of response to stimulus               | 832          | 1.50E-41   |
| <b>Infected</b>                                  |              |            |
| Immune system process                            | 806          | 2.90E-75   |
| Cell activation                                  | 460          | 2.40E-66   |
| Leukocyte activation                             | 406          | 2.10E-57   |
| Immune effector process                          | 378          | 3.90E-53   |
| Immune response                                  | 585          | 2.10E-50   |
| Response to external stimulus                    | 548          | 1.20E-49   |
| Secretion                                        | 449          | 4.90E-49   |
| Secretion by cell                                | 419          | 1.90E-47   |
| Regulation of response to stimulus               | 845          | 8.30E-45   |
| Cell activation involved in immune response      | 256          | 2.60E-44   |
| Leukocyte activation involved in immune response | 254          | 9.60E-44   |
| Regulated exocytosis                             | 265          | 4.30E-43   |
| Cellular response to chemical stimulus           | 689          | 2.00E-42   |
| Regulation of multicellular organismal process   | 643          | 8.00E-42   |
| Myeloid leukocyte activation                     | 236          | 2.90E-41   |



**Supplemental Table S6.** Differentially expressed gene lists for infected vs. uninfected individuals, controlling for sex and RIN score.

| Model: ~sex+RIN+Infection (Fold changes relative to uninfected baseline) |          |                  |                 |
|--------------------------------------------------------------------------|----------|------------------|-----------------|
| Symbol                                                                   | Q value  | log2 Fold Change | Ensembl ID      |
| CD4                                                                      | 3.24E-05 | -1.58            | ENSG00000010610 |
| DGKG                                                                     | 2.04E-04 | 0.81             | ENSG00000058866 |
| CTSA                                                                     | 1.39E-03 | 0.48             | ENSG00000064601 |
| GPIHBP1                                                                  | 1.39E-03 | 0.95             | ENSG00000277494 |
| AATK                                                                     | 3.04E-03 | 1.00             | ENSG00000181409 |
| ACSS2                                                                    | 8.19E-03 | 0.57             | ENSG00000131069 |
| SLC6A6                                                                   | 8.19E-03 | 0.43             | ENSG00000131389 |
| TPCN2                                                                    | 8.19E-03 | 0.60             | ENSG00000162341 |
| MGAM                                                                     | 8.19E-03 | 0.55             | ENSG00000257335 |
| CCDC93                                                                   | 5.27E-02 | 0.24             | ENSG00000125633 |
| ARHGAP25                                                                 | 5.91E-02 | 0.42             | ENSG00000163219 |
| ABHD2                                                                    | 6.66E-02 | 0.55             | ENSG00000140526 |
| YTHDC2                                                                   | 7.52E-02 | -0.47            | ENSG00000047188 |
| BCL2L13                                                                  | 7.79E-02 | 0.31             | ENSG00000099968 |
| TGIF2                                                                    | 7.79E-02 | -0.40            | ENSG00000118707 |
| TNNI2                                                                    | 7.79E-02 | 0.91             | ENSG00000130598 |
| ANAPC5                                                                   | 7.98E-02 | 0.21             | ENSG00000089053 |
| ECE1                                                                     | 7.98E-02 | 0.33             | ENSG00000117298 |
| CCDC189                                                                  | 7.98E-02 | 0.90             | ENSG00000196118 |
| SRXN1                                                                    | 7.98E-02 | 0.40             | ENSG00000271303 |
| VPS25                                                                    | 9.08E-02 | 0.34             | ENSG00000131475 |
| TBC1D14                                                                  | 9.74E-02 | 0.43             | ENSG00000132405 |
| SLC11A1                                                                  | 1.10E-01 | 0.72             | ENSG00000018280 |
| CD93                                                                     | 1.13E-01 | 0.67             | ENSG00000125810 |
| IGF1R                                                                    | 1.20E-01 | 0.45             | ENSG00000140443 |
| LRRC27                                                                   | 1.22E-01 | 0.72             | ENSG00000148814 |
| SLAMF6                                                                   | 1.25E-01 | -0.39            | ENSG00000162739 |
| TM6SF1                                                                   | 1.26E-01 | 0.31             | ENSG00000136404 |
| SDC2                                                                     | 1.26E-01 | 1.98             | ENSG00000169439 |
| DENND3                                                                   | 1.29E-01 | 0.35             | ENSG00000105339 |
| GAB2                                                                     | 1.33E-01 | 0.47             | ENSG00000033327 |

|          |          |       |                 |
|----------|----------|-------|-----------------|
| NINJ1    | 1.40E-01 | 0.42  | ENSG00000131669 |
| CD101    | 1.40E-01 | 0.96  | ENSG00000134256 |
| PTX4     | 1.49E-01 | 0.70  | ENSG00000251692 |
| DDX3Y    | 1.61E-01 | 4.96  | ENSG00000067048 |
| SLC25A16 | 1.69E-01 | 1.02  | ENSG00000122912 |
| KBTBD11  | 1.74E-01 | 0.96  | ENSG00000176595 |
| FES      | 1.74E-01 | 0.45  | ENSG00000182511 |
| TBXA2R   | 1.75E-01 | -1.74 | ENSG00000006638 |
| CADM3    | 1.76E-01 | 1.32  | ENSG00000162706 |
| ADPGK    | 1.77E-01 | 0.40  | ENSG00000159322 |
| ARHGEF40 | 1.79E-01 | 0.91  | ENSG00000165801 |
| STAG3    | 1.81E-01 | -0.26 | ENSG00000066923 |
| SGK1     | 1.81E-01 | 0.62  | ENSG00000118515 |
| ADAM33   | 1.81E-01 | 0.90  | ENSG00000149451 |
| CALM1    | 1.81E-01 | -0.23 | ENSG00000198668 |
| MAPKAPK5 | 1.86E-01 | 0.32  | ENSG00000089022 |
| GIT2     | 1.86E-01 | 0.23  | ENSG00000139436 |
| KIF13A   | 1.88E-01 | 0.66  | ENSG00000137177 |
| SMCR8    | 1.95E-01 | 0.32  | ENSG00000176994 |
| TCN2     | 1.95E-01 | 0.96  | ENSG00000185339 |
| TFB2M    | 2.00E-01 | -0.29 | ENSG00000162851 |
| CLEC7A   | 2.00E-01 | 0.43  | ENSG00000172243 |

---

**Supplemental Table S7.** Full results of GO analysis.

| <b>Up</b>                                 |                             | <b>Down</b>                                                |                             |
|-------------------------------------------|-----------------------------|------------------------------------------------------------|-----------------------------|
| <i>Top Enriched GO Term</i>               | <i>Corrected GO P Value</i> | <i>Top Enriched GO Term</i>                                | <i>Corrected GO P Value</i> |
| cellular metabolic process                | 8.09E-09                    | positive regulation of biological process                  | 4.65E-04                    |
| vesicle-mediated transport                | 3.70E-07                    | positive regulation of cytosolic calcium ion-concentration | 4.99E-03                    |
| regulation of catalytic activity          | 7.49E-07                    |                                                            |                             |
| biological regulation                     | 8.45E-07                    |                                                            |                             |
| response to stimulus                      | 1.19E-06                    |                                                            |                             |
| regulation of biological process          | 1.53E-06                    |                                                            |                             |
| positive regulation of molecular function | 1.56E-06                    |                                                            |                             |
| regulation of molecular function          | 4.98E-06                    |                                                            |                             |
| transport                                 | 6.19E-06                    |                                                            |                             |
| positive regulation of catalytic activity | 7.76E-06                    |                                                            |                             |
| establishment of localization             | 8.57E-06                    |                                                            |                             |
| organonitrogen compound metabolic process | 3.12E-05                    |                                                            |                             |
| organic substance metabolic process       | 4.03E-05                    |                                                            |                             |
| catabolic process                         | 7.83E-05                    |                                                            |                             |
| regulation of cellular process            | 8.50E-05                    |                                                            |                             |
| primary metabolic process                 | 1.04E-04                    |                                                            |                             |
| signaling                                 | 2.52E-04                    |                                                            |                             |
| phosphorylation                           | 3.71E-04                    |                                                            |                             |
| signal transduction                       | 4.10E-04                    |                                                            |                             |
| protein metabolic process                 | 4.52E-04                    |                                                            |                             |
| cellular catabolic process                | 1.07E-03                    |                                                            |                             |
| cellular response to stimulus             | 1.44E-03                    |                                                            |                             |
| cell communication                        | 1.47E-03                    |                                                            |                             |
| positive regulation of hydrolase activity | 1.66E-03                    |                                                            |                             |
| establishment of localization in cell     | 1.67E-03                    |                                                            |                             |
| phosphorus metabolic process              | 2.42E-03                    |                                                            |                             |
| cellular protein metabolic                | 2.60E-03                    |                                                            |                             |

|                                     |          |
|-------------------------------------|----------|
| process                             |          |
| regulated exocytosis                | 3.43E-03 |
| cellular component organization     | 3.59E-03 |
| intracellular transport             | 3.72E-03 |
| nitrogen compound metabolic process | 4.69E-03 |

---

**Supplemental Table S8.** CIBERSORT output for relative immune cell proportions.

| Sample  | Sex | Mem B | CD8  | naive CD4+ | Mem rest CD4+ | Mem act CD4+ | rest NK | Monocytes | Macrophages | Neutrophils |
|---------|-----|-------|------|------------|---------------|--------------|---------|-----------|-------------|-------------|
| RC108   | F   | 0.10  | 0.31 | 0.00       | 0.04          | 0.10         | 0.17    | 0.08      | 0.06        | 0.15        |
| RC109   | F   | 0.16  | 0.25 | 0.00       | 0.00          | 0.13         | 0.21    | 0.09      | 0.05        | 0.10        |
| RC111   | F   | 0.08  | 0.34 | 0.00       | 0.09          | 0.12         | 0.18    | 0.06      | 0.04        | 0.09        |
| RC124   | F   | 0.11  | 0.31 | 0.04       | 0.00          | 0.07         | 0.25    | 0.11      | 0.02        | 0.08        |
| RC125   | F   | 0.08  | 0.27 | 0.00       | 0.05          | 0.10         | 0.25    | 0.08      | 0.02        | 0.15        |
| RC127   | F   | 0.09  | 0.27 | 0.04       | 0.04          | 0.08         | 0.14    | 0.08      | 0.04        | 0.22        |
| RC128   | F   | 0.13  | 0.26 | 0.00       | 0.05          | 0.08         | 0.18    | 0.06      | 0.04        | 0.19        |
| RC130   | F   | 0.17  | 0.30 | 0.00       | 0.07          | 0.09         | 0.28    | 0.05      | 0.02        | 0.01        |
| RC100   | M   | 0.08  | 0.36 | 0.00       | 0.00          | 0.08         | 0.26    | 0.10      | 0.04        | 0.07        |
| RC101   | M   | 0.10  | 0.25 | 0.01       | 0.00          | 0.14         | 0.21    | 0.07      | 0.03        | 0.19        |
| RC102   | M   | 0.13  | 0.40 | 0.02       | 0.00          | 0.08         | 0.22    | 0.04      | 0.01        | 0.09        |
| RC103   | M   | 0.04  | 0.37 | 0.00       | 0.04          | 0.12         | 0.21    | 0.08      | 0.03        | 0.12        |
| RC104   | M   | 0.08  | 0.39 | 0.03       | 0.00          | 0.10         | 0.17    | 0.08      | 0.03        | 0.09        |
| RC105   | M   | 0.12  | 0.34 | 0.13       | 0.00          | 0.10         | 0.18    | 0.06      | 0.02        | 0.05        |
| RC106   | M   | 0.10  | 0.43 | 0.01       | 0.00          | 0.10         | 0.21    | 0.06      | 0.03        | 0.06        |
| RC107   | M   | 0.08  | 0.46 | 0.00       | 0.01          | 0.09         | 0.22    | 0.04      | 0.02        | 0.08        |
| RC110   | M   | 0.08  | 0.32 | 0.00       | 0.01          | 0.12         | 0.17    | 0.05      | 0.08        | 0.15        |
| RC112   | M   | 0.06  | 0.20 | 0.06       | 0.05          | 0.10         | 0.22    | 0.05      | 0.04        | 0.21        |
| RC115   | M   | 0.09  | 0.19 | 0.00       | 0.06          | 0.17         | 0.25    | 0.05      | 0.03        | 0.15        |
| RC116   | M   | 0.05  | 0.30 | 0.00       | 0.00          | 0.11         | 0.22    | 0.07      | 0.07        | 0.17        |
| RC117   | M   | 0.06  | 0.22 | 0.07       | 0.01          | 0.14         | 0.19    | 0.10      | 0.06        | 0.15        |
| RC118   | M   | 0.12  | 0.21 | 0.03       | 0.15          | 0.05         | 0.12    | 0.08      | 0.06        | 0.17        |
| RC119   | M   | 0.06  | 0.37 | 0.00       | 0.00          | 0.13         | 0.19    | 0.08      | 0.03        | 0.14        |
| RC120   | M   | 0.11  | 0.32 | 0.07       | 0.00          | 0.08         | 0.22    | 0.07      | 0.02        | 0.10        |
| RC121   | M   | 0.09  | 0.23 | 0.10       | 0.00          | 0.14         | 0.23    | 0.04      | 0.07        | 0.08        |
| RC122   | M   | 0.10  | 0.36 | 0.00       | 0.07          | 0.10         | 0.19    | 0.04      | 0.04        | 0.09        |
| RC123   | M   | 0.14  | 0.13 | 0.00       | 0.07          | 0.08         | 0.18    | 0.09      | 0.09        | 0.21        |
| RC126   | M   | 0.07  | 0.23 | 0.02       | 0.00          | 0.10         | 0.21    | 0.06      | 0.03        | 0.29        |
| RC129   | M   | 0.23  | 0.18 | 0.03       | 0.00          | 0.07         | 0.15    | 0.08      | 0.03        | 0.22        |
| Average |     | 0.10  | 0.30 | 0.02       | 0.03          | 0.10         | 0.20    | 0.07      | 0.04        | 0.13        |

**Supplemental Figure S1.** (Above) Cluster (k) selection for k-means clustering based on the elbow method. (Below) t-SNE maps for infected and uninfected individuals based on the number of clusters.

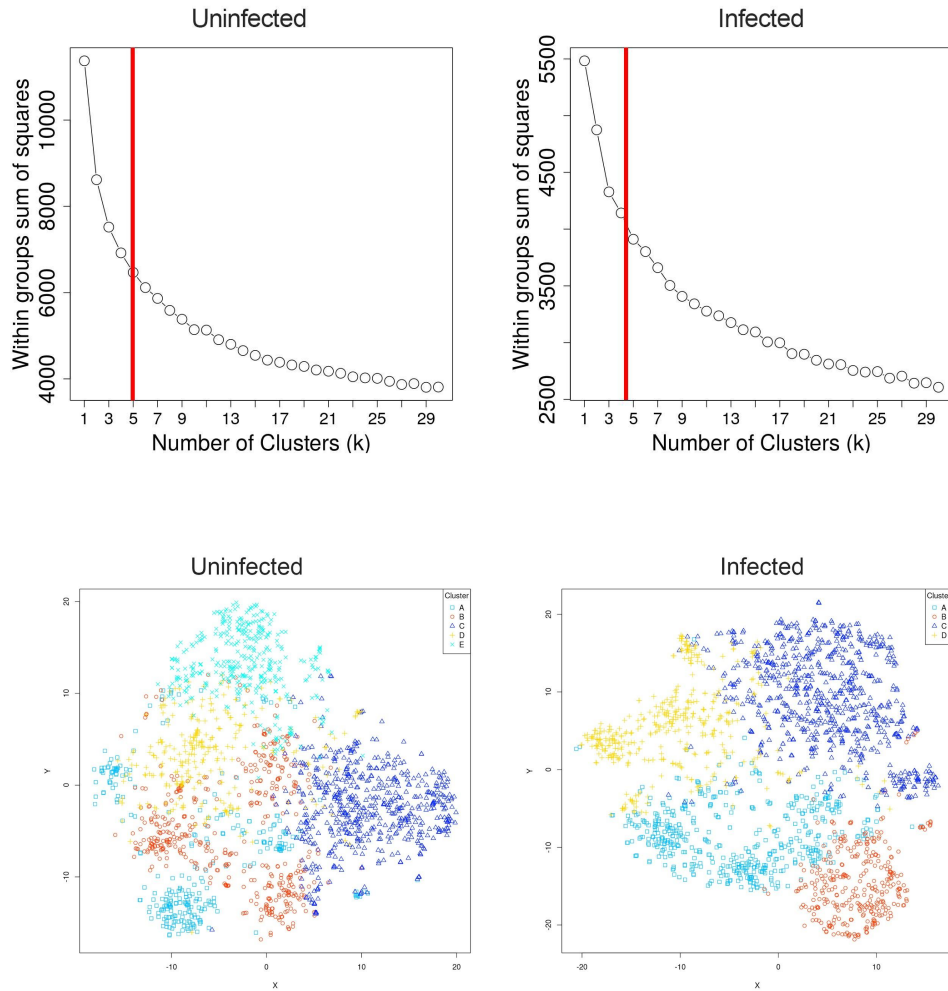

Supplement: supplementary_material_evz099.pdf [file supplementary_material_evz099.pdf]
